# Supplementary material for: Vertical profiles of volatile organic compounds and fine particles in atmospheric air by using an aerial drone with miniaturized samplers and portable devices
Source: Copernicus journal article supplement (doi:10.5194/acp-23-5885-2023), 2023-05-30
Supplement: Supplementary file 1 [file acp-23-5885-2023-supplement.pdf]

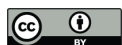

*Supplement of*

## **Vertical profiles of volatile organic compounds and fine particles in atmospheric air by using an aerial drone with miniaturized samplers and portable devices**

**Eka Dian Pusfitasari et al.**

*Correspondence to:* Kari Hartonen ([kari.hartonen@helsinki.fi](mailto:kari.hartonen@helsinki.fi)) and Marja-Liisa Riekkola ([marja-liisa.riekkola@helsinki.fi](mailto:marja-liisa.riekkola@helsinki.fi))

The copyright of individual parts of the supplement might differ from the article licence.

## **Supplemental information S1.** Reagents and materials

**Supplemental Figure S1.** The schematic of sample collection using SPME Arrow and ITEX from mixed altitudes (from 50 to 400 m). During the flight of the drone, the portable BC monitor and CPC devices were carried out measurements.

**Supplemental Figure S2.** The schematic of sample collection using ITEX and SPME Arrow systems at the altitude of 50 m. During the flight of the drone, the portable BC monitor and CPC devices were carried out measurements.

**Supplemental Figure S3.** The schematic of sample collection using ITEX and SPME Arrow sampling systems at the altitude of 400 m. During the flight of the drone, the portable BC monitor and CPC devices were carried out measurements.

**Supplemental Figure S4.** The schematic of sample collection, specifically those of aerosol particles, using ITEX with filter accessories, during horizontal and vertical concentration gradients. During the flight of the drone, the portable BC monitor and CPC devices were carried out measurements.

**Supplemental Figure S5.** Correlation of VOCs detected at the SMEAR II Station at the mixed altitudes from 50 to 400 m.

**Supplemental Figure S6.** Evaluation of ITEX filter accessories in collecting gas phase. The gaseous samples were collected using TENAX-GR-ITEX system with filter accessories (left) and CWR-SPME-Arrow system (right) at the altitudes from 50 to 400 m. White color represents that compound was not detected.

**Supplemental Figure S7.** The comparison studies of portable CPC and portable BC monitor located in the drone with their reference instruments.

**Supplemental Table S1.** The average of ambient pressures and temperatures at certain altitudes between 9 to 11 October 2021 at SMEAR II Station, Hyytiälä. Ambient temperatures were measured by a sensor attached in the drone box (Figure 1-D in main article).

**Supplemental Table S2.** Repeatability studies for TENAX-GR-ITEX sampling system (i.e. within ITEX). Table includes all data points from repeatability series done by the lab-made autosampler. All

values given for amines are reported as relative peak area per litre of sample. Each ITEX unit was run five times to get the repeatability value.

**Supplemental Table S3.** Reproducibility between ITEX units used in injections by lab-made autosampler.

**Supplemental Table S4.** The tested compositions of the HILIC-MS/MS eluent.

**Supplemental Table S5.** Established MRM method parameters for each compound. Based on the product ion scans, the optimal collision energy (CE) was determined for the compounds to obtain maximum response to the most abundant product ion.

**Supplemental Table S6.** The calculated LOQs for results achieved by ITEX and SPME Arrow systems.

**Supplemental Table S7.** Concentrations of nitrogen-containing compounds detected in gas and particle phases at mixed altitudes (50 – 400 m). Conversion from  $\text{ng m}^{-3}$  to  $\text{ppt}_v$  have been made using the conversion factor ( $\text{ppt}_v = \text{Concentration (ng m}^{-3}) : (0.0409 \times (\text{MW}))$ ).

**Supplemental Table S8.** Concentrations of other volatile organic compounds detected in gas and particle phases at mixed altitudes (50 – 400 m). Conversion from  $\text{ng m}^{-3}$  to  $\text{ppt}_v$  have been made using the conversion factor ( $\text{ppt}_v = \text{Concentration (ng m}^{-3}) : (0.0409 \times (\text{MW}))$ ).

**Supplemental Table S9.** Recoveries obtained for compounds collected by ITEX sampling system with filter accessory.

**Supplemental Table S10.** Determined LODs and LOQs for the acids based on parameters provided by linear regression analysis using HILIC/MS-MS

**Supplemental Table S11.** Two minutes average of black carbon (BC) and total particle concentrations measured at the altitudes of 100, 200, 300, and 400 m in three days measurement (9, 10, and 11 October 2021).

**Supplemental Table S12.** Daily average of black carbon (BC) and total particle concentrations measured at the altitudes of 100, 200, 300, and 400 m in three days measurement (9, 10, and 11 October 2021).

## Supplemental information S1. Reagents and materials

1-Butanamine (99%), 2-propen-1-amine (98%), 4-ketopimelic acid (98%), citric acid ( $\geq 99.5\%$ ), crotonic acid (98%), cis-pinonic acid (98%), decafluorobiphenyl (99%), ethylbenzene (99%), hexanal (98%), hexylamine (99%), isobutylamine (99%), N,N-dimethylformamide ( $\geq 99.9\%$ ), methyl isobutyl ketone (98.5%), p-cymene (99%), trimestic acid (95%), L-tartaric acid (99%), suberic acid (98%), and triphenyl phosphate ( $\geq 99\%$ ) were purchased from Sigma-Aldrich (St. Louis, MO, USA). Pyridine ( $\sim 100\%$ ) and formic acid (99-100%) were purchased from VWR Chemicals (Fontenay-sous-Bois, France). 2,3-Butanedione (97%) and ethyl acetate ( $\geq 99.7\%$ ) were purchased from Sigma-Aldrich Chemie GmbH (Steinheim, Germany). 1-Butanenitrile (99%), 2-butanol (99.5%), acetic acid ( $\geq 99.8\%$ ), glutaric acid ( $\geq 99\%$ ), isobutanol ( $\geq 98.5\%$ ), phthalic acid ( $\geq 99.5\%$ ), and succinic acid (99%) were purchased from Merck KGaA (Darmstadt, Germany). Acetonitrile ( $\geq 99.9\%$ ) and methanol ( $\geq 99.9\%$ ) were purchased from Honeywell (USA). Ammonium carbonate (chem. Pure) was purchased from Riedel de Haen. Ammonium acetate (99.9 %) was purchased from Fisher Scientific. Azelaic acid ( $\geq 99\%$ ), benzaldehyde ( $\geq 99\%$ ), diethylamine (99%), fumaric acid ( $\geq 98\%$ ), glycolic acid ( $\geq 99\%$ ), maleic acid ( $\geq 99\%$ ), malonic acid ( $\geq 98\%$ ), sebaric acid (p.a.), and vanillic acid ( $\geq 97\%$ ) were purchased from Fluka AG (Switzerland). Adipic acid ( $\geq 99.9\%$ ) and mandelic acid ( $\geq 99.5\%$ ) were purchased from BDH Laboratory Reagent. Acetophenone was from The British Drug Houses Ltd. (Poole, England). Trimethylamine filled Dynacal Permeation Tube (type HE-XLT2) was from VICI Metronics Inc., (Poulsbo, USA).

### Supplemental Figure S1

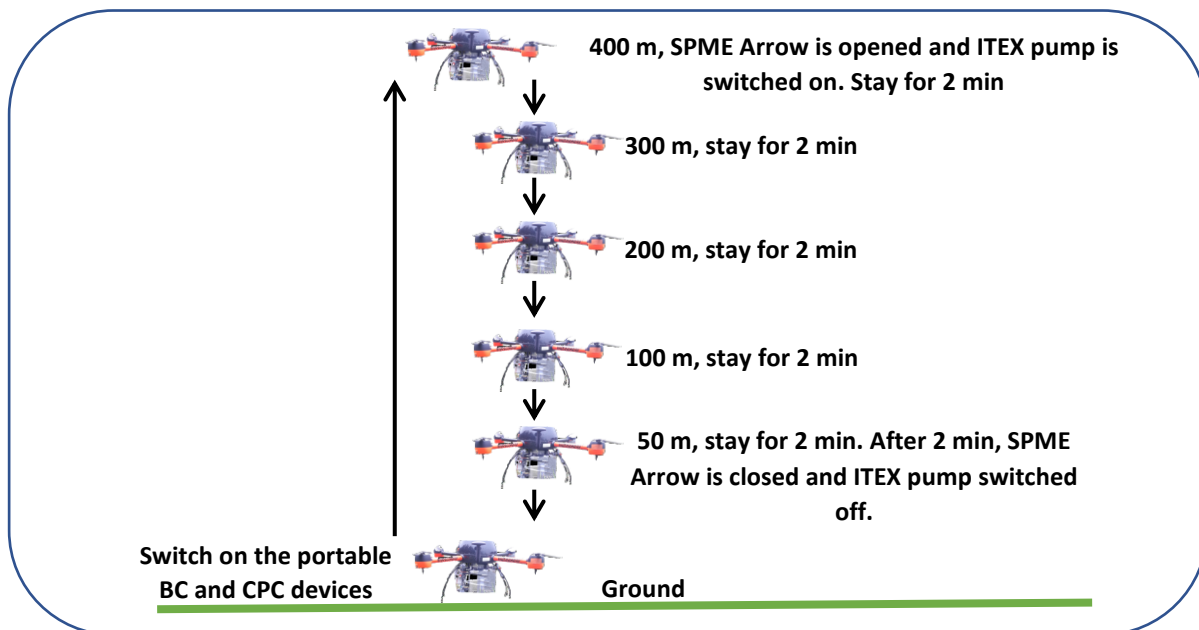

The schematic of sample collection using SPME Arrow and ITEX from mixed altitudes (from 50 to 400 m). During the flight of the drone, the portable BC monitor and CPC devices were carried out measurements.

### Supplemental Figure S2

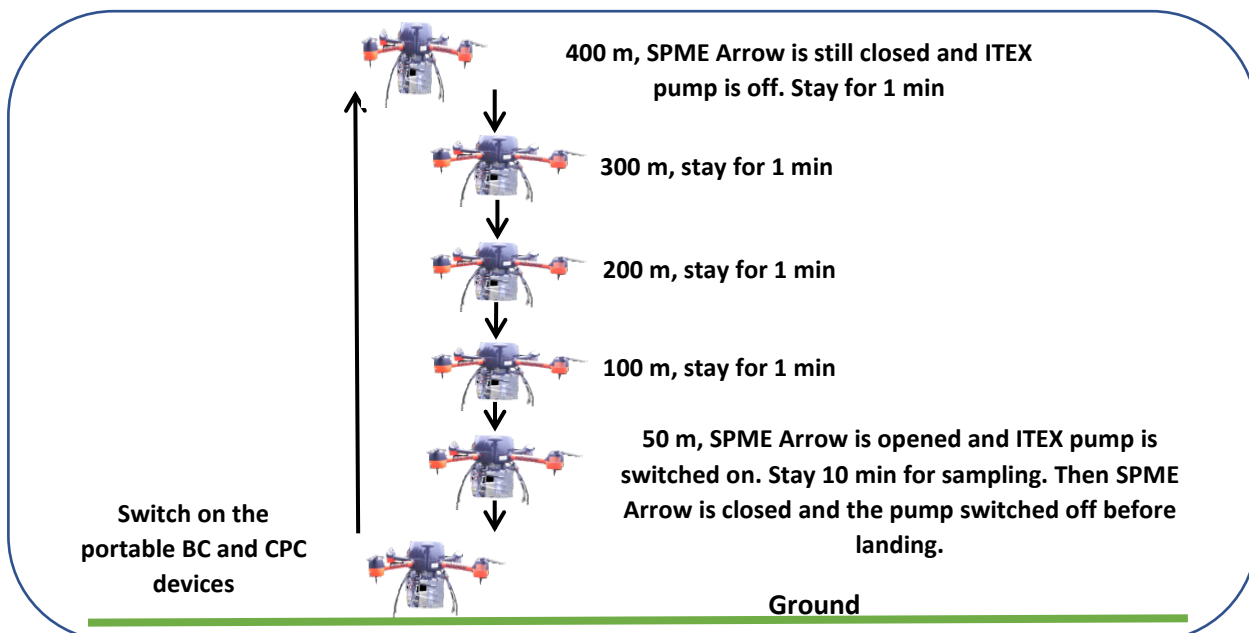

The schematic of sample collection using ITEX and SPME Arrow at the altitude of 50 m. During the flight of the drone, the portable BC monitor and CPC devices were carried out measurements.

### Supplemental Figure S3

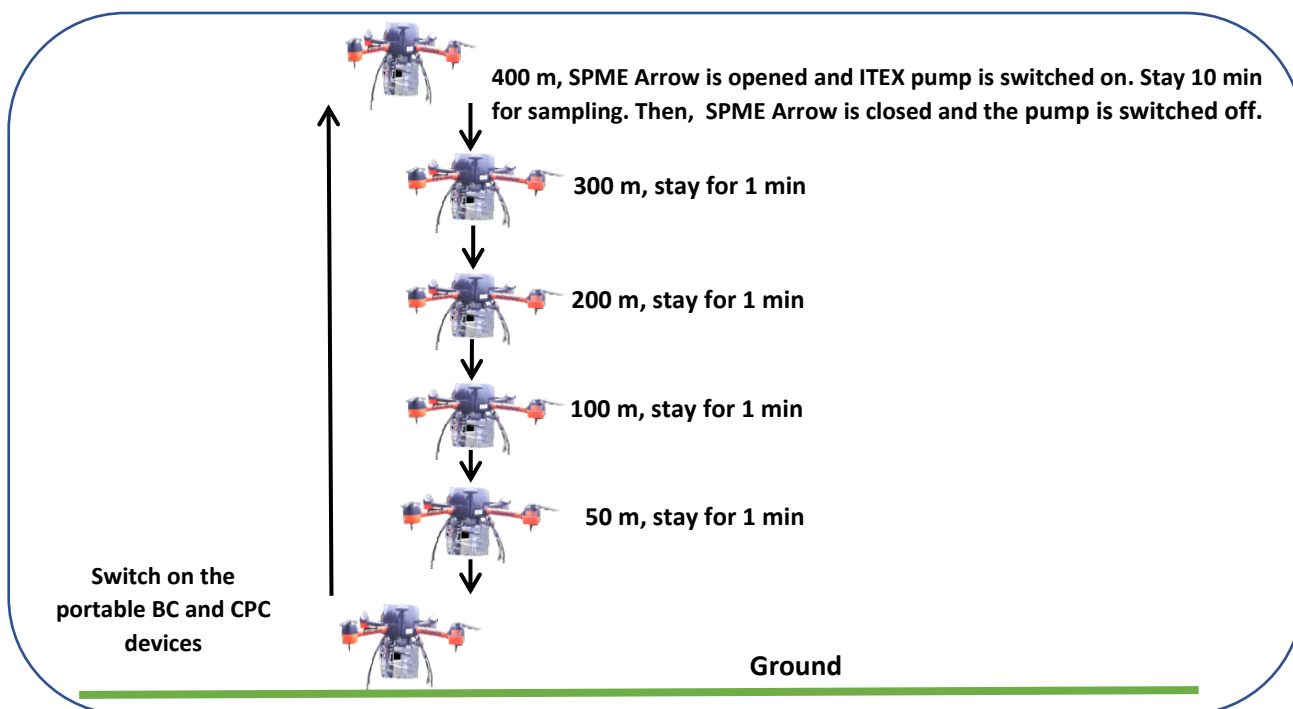

The schematic of sample collection using ITEX and SPME Arrow sampling systems at the altitude of 400 m. During the flight of the drone, the portable BC monitor and CPC devices were carried out measurements.

## Supplemental Figure S4

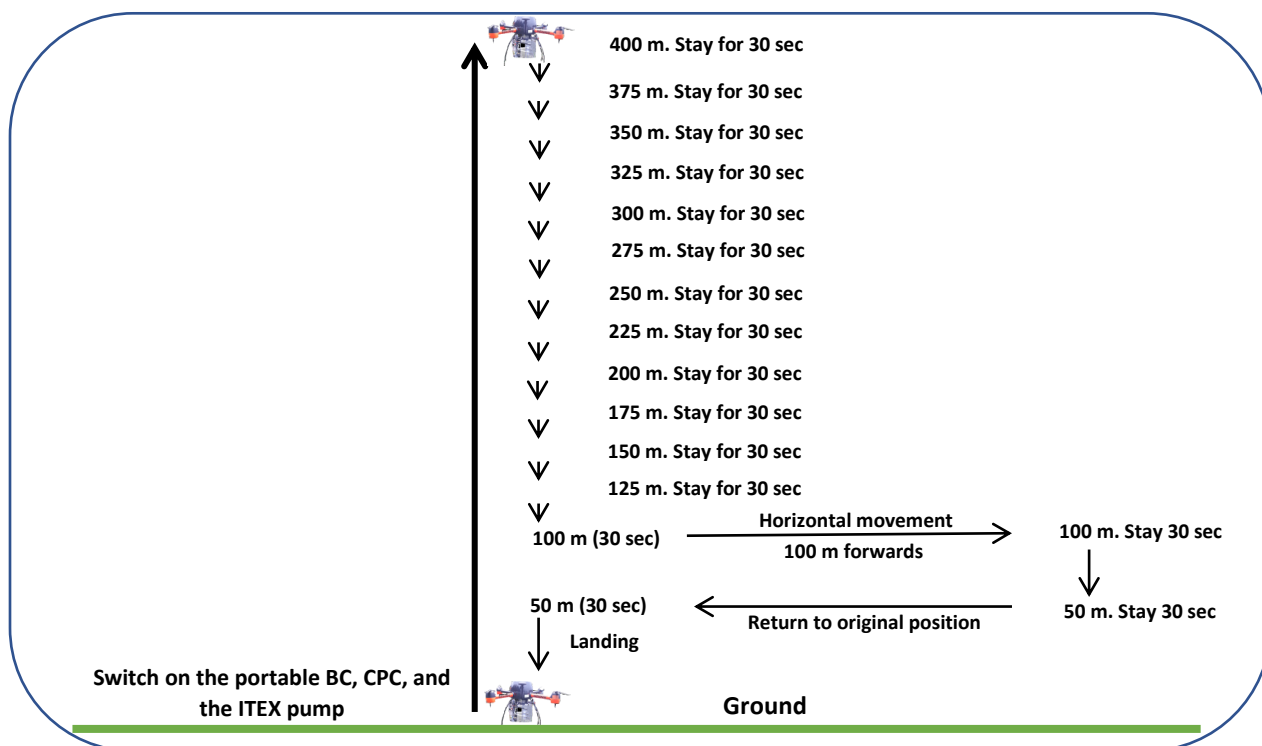

The schematic of sample collection, specifically those of aerosol particles, using ITEX with filter accessories, during horizontal and vertical concentration gradients. During the flight of the drone, the portable BC monitor and CPC devices were carried out measurements.

# Supplemental Figure S5

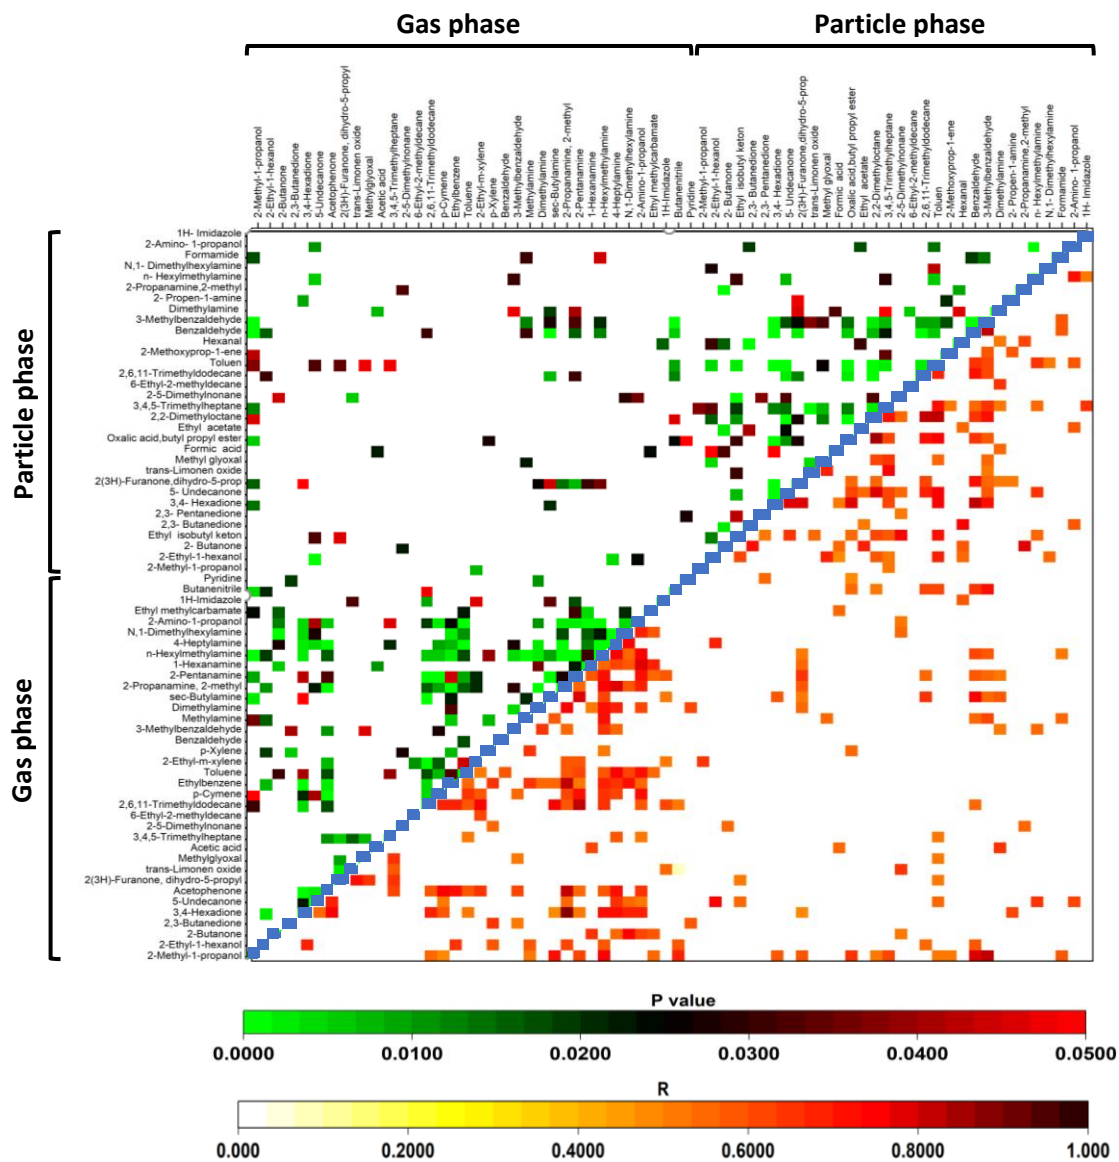

Correlation of VOCs detected at the SMEAR II Station at the mixed altitudes from 50 to 400 m.



## Supplemental Figure S6

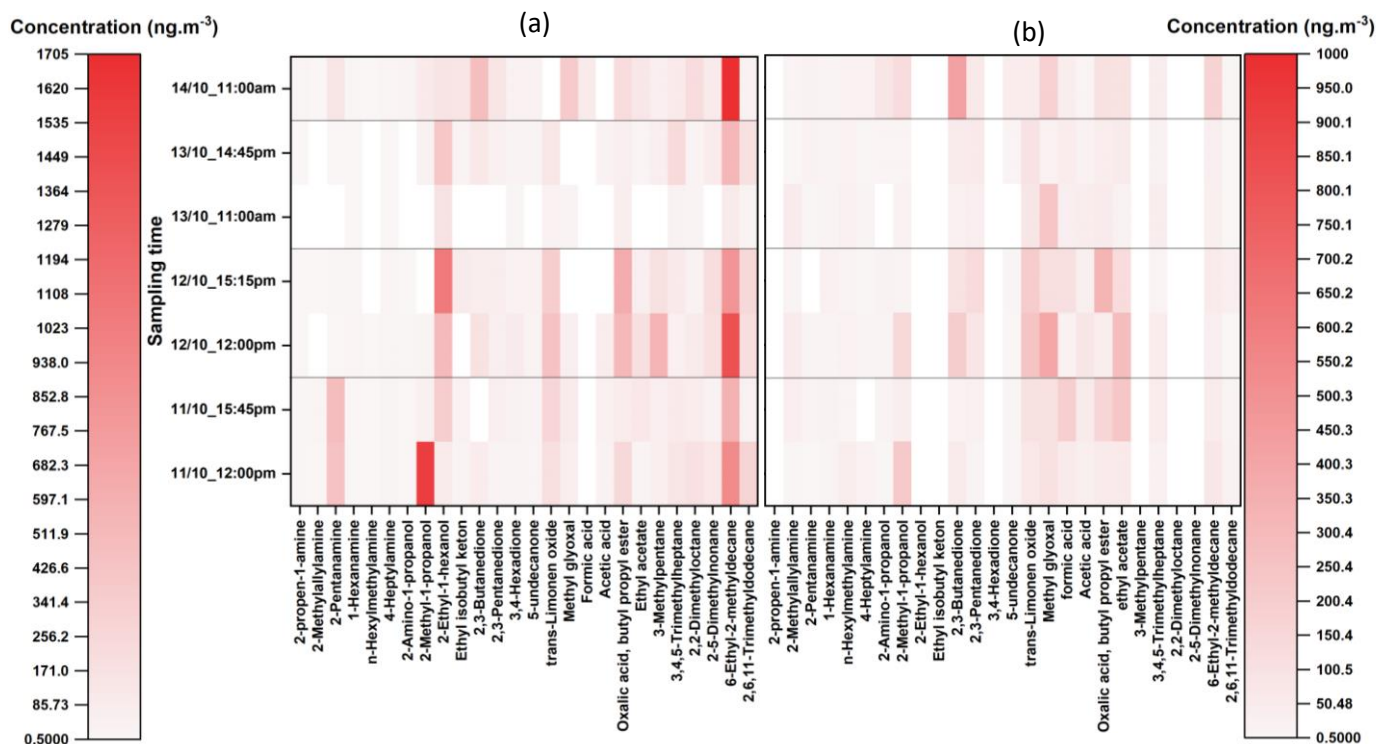

Evaluation of ITEX filter accessories in collecting gas phase. The gaseous samples were collected using (a) TENAX-GR-ITEX system with filter accessories and (b) CWR-SPME-Arrow system at the altitudes from 50 to 400 m. White color represents that compound was not detected.

### Supplemental Figure S7

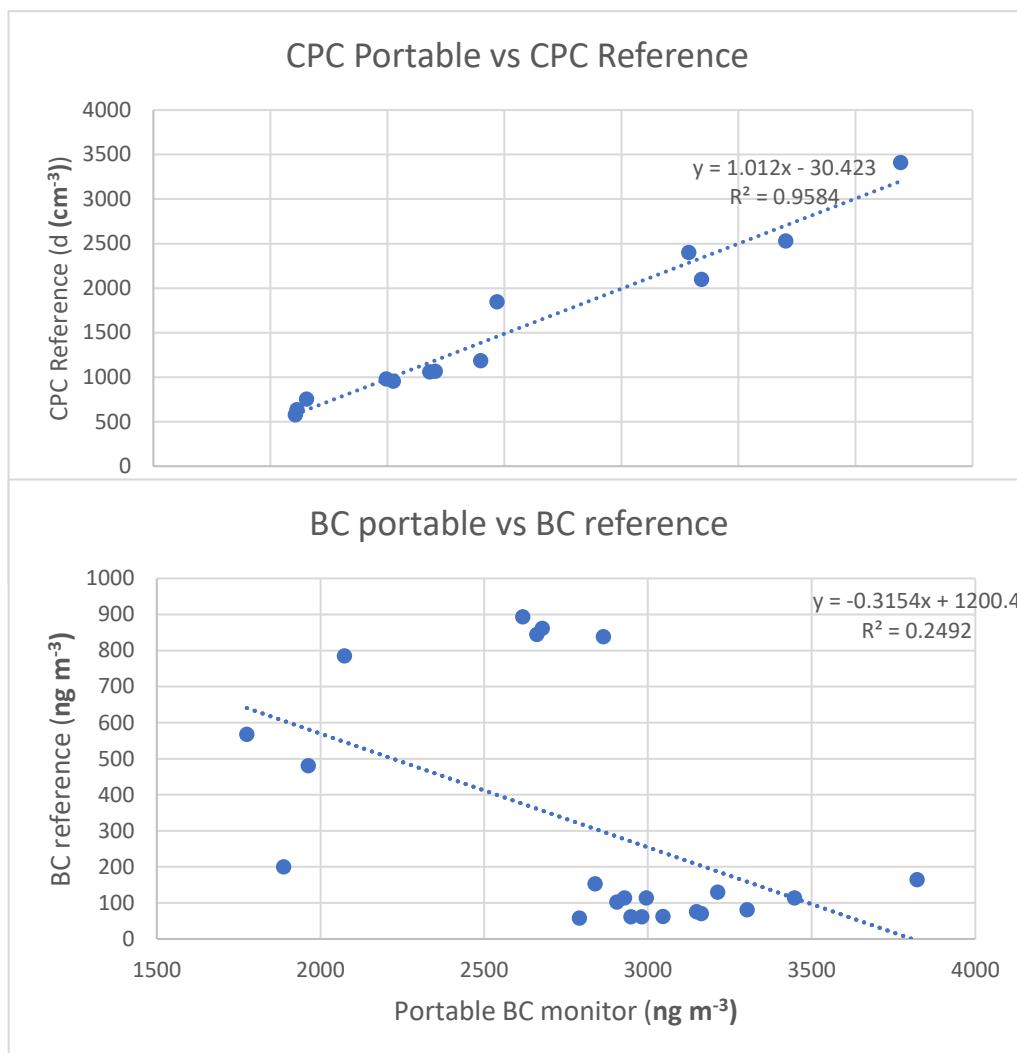

The comparison studies of portable CPC and portable BC monitor located in the drone with their reference instruments.

## Supplementary Table S1

The average of ambient pressures and temperatures at certain altitudes between 9 to 11 October 2021 at SMEAR II Station, Hyytiälä. Ambient temperatures were measured by a sensor attached in the drone box (Figure 1d in main article).

| Altitude (m)           | P <sub>0</sub> (Pa) | P <sub>1</sub> (Pa) | T <sub>0</sub> (K) | T <sub>1</sub> (°C) | T <sub>1</sub> (K) | <sup>a</sup> Correction factor |
|------------------------|---------------------|---------------------|--------------------|---------------------|--------------------|--------------------------------|
| 400 m                  | 101325              | 96493               | 293                | 7.8                 | 280.8              | 0.994                          |
| 375 m                  | 101325              | 96791               | 293                | 7.9                 | 280.9              | 0.996                          |
| 365 m                  | 101325              | 96909               | 293                | 7.9                 | 280.9              | 0.998                          |
| 350 m                  | 101325              | 97088               | 293                | 7.9                 | 280.9              | 0.999                          |
| 325 m                  | 101325              | 97386               | 293                | 7.9                 | 280.9              | 1.002                          |
| 300 m                  | 101325              | 97685               | 293                | 8.0                 | 281.0              | 1.005                          |
| 275 m                  | 101325              | 97986               | 293                | 8.1                 | 281.1              | 1.008                          |
| 250 m                  | 101325              | 98287               | 293                | 8.2                 | 281.2              | 1.011                          |
| 225 m                  | 101325              | 98588               | 293                | 8.3                 | 281.3              | 1.013                          |
| 200 m                  | 101325              | 98893               | 293                | 8.7                 | 281.7              | 1.015                          |
| 175 m                  | 101325              | 99195               | 293                | 8.8                 | 281.8              | 1.018                          |
| 150 m                  | 101325              | 99497               | 293                | 8.8                 | 281.8              | 1.021                          |
| 125 m                  | 101325              | 99800               | 293                | 8.9                 | 281.9              | 1.024                          |
| 100 m                  | 101325              | 100105              | 293                | 9.3                 | 282.3              | 1.025                          |
| 50 m                   | 101325              | 100714              | 293                | 9.6                 | 282.6              | 1.030                          |
| 0 m                    | 101325              | 101325              | 293                | 10.2                | 283.2              | 1.035                          |
| <sup>b</sup> Mixed alt | 101325              | 98465               | 293                | 8.4                 | 281.4              | 1.012                          |

\*P<sub>0</sub> = standard atmospheric pressure (101.3 kPa)

\*P<sub>1</sub> = Average of ambient atmospheric pressure at certain altitude

\*T<sub>0</sub> = standard temperature (293 K)

\*T<sub>1</sub> = Average of ambient temperature at certain altitude

\*a = Calculated correction factor at certain altitude, consider different temperature and pressure.

\*b = Mixed altitudes (from 50 m to 400 m).

### Supplementary Table S2.

Repeatability studies for TENAX-GR-ITEX sampling system (i.e. within ITEX). Table includes all data points from repeatability series done by the lab-made autosampler. All values given for amines are reported as relative peak area per litre of sample. Each ITEX unit was run five times to get the repeatability value.

| <b>ITEX (Repetition)</b> | <b>#1</b>  | <b>#2</b>  | <b>#3</b>  | <b>#4</b>  | <b>#5</b>  | <b>Avg (SD)</b> | <b>Avg (RSD)</b> |
|--------------------------|------------|------------|------------|------------|------------|-----------------|------------------|
| <b>Model Compounds</b>   | <b>Avg</b> | <b>Avg</b> | <b>Avg</b> | <b>Avg</b> | <b>Avg</b> |                 |                  |
| 2-Propen-1-amine         | 4.4        | 4          | 3.8        | 4.4        | 4.2        | 0.1             | 3.5              |
| Diethylamine             | 2.3        | 2.5        | 2.4        | 2.6        | 2.6        | 0.2             | 7.1              |
| Isobutylamine            | 7.2        | 6.5        | 6.3        | 7          | 6.7        | 0.2             | 3.5              |
| 1-Hexanamine             | 14.1       | 11.8       | 11.6       | 13.9       | 13.4       | 0.4             | 3.5              |
| Triethylamine            | 48.7       | 43.7       | 42.8       | 43.7       | 42.6       | 1.5             | 3.4              |
| 1-Nitropropane           | 0.3        | 0.2        | 0.2        | 0.3        | 0.3        | 0               | 5.8              |
| Pyridine                 | 8.5        | 7.7        | 7.5        | 8.1        | 7.9        | 0.3             | 3.7              |
| Dipropylamine            | 28.9       | 25.9       | 25.3       | 26.6       | 25.6       | 0.9             | 3.7              |

\*Avg = Average

\*SD = Standard deviation

\*RSD = Relative standard deviation

### Supplementary Table S3.

Reproducibility between ITEX units used in injections by lab-made autosampler.

| <b>Model Compounds</b> | <b>ITEX (repetition)</b> |           |           |           |           | <b>Avg 1-5</b> | <b>SD</b> | <b>RSD</b> |
|------------------------|--------------------------|-----------|-----------|-----------|-----------|----------------|-----------|------------|
|                        | <b>#1</b>                | <b>#2</b> | <b>#3</b> | <b>#4</b> | <b>#5</b> |                |           |            |
| 2-Propen-1-amine       | 4.4                      | 4         | 3.8       | 4.4       | 4.2       | 4.2            | 0.2       | 5.6        |
| Diethylamine           | 2.3                      | 2.5       | 2.4       | 2.6       | 2.6       | 2.5            | 0.1       | 4.7        |
| Isobutylamine          | 7.2                      | 6.5       | 6.3       | 7         | 6.7       | 6.7            | 0.3       | 4.8        |
| 1-Hexanamine           | 14.1                     | 11.8      | 11.6      | 13.9      | 13.4      | 13             | 1.1       | 8.1        |
| Triethylamine          | 48.7                     | 43.7      | 42.8      | 43.7      | 42.6      | 44.3           | 2.2       | 5.1        |
| 1-Nitropropane         | 0.3                      | 0.2       | 0.2       | 0.3       | 0.3       | 0.3            | 0         | 18.8       |
| Pyridine               | 8.5                      | 7.7       | 7.5       | 8.1       | 7.9       | 7.9            | 0.3       | 4.3        |
| Dipropylamine          | 28.9                     | 25.9      | 25.3      | 26.6      | 25.6      | 26.5           | 1.3       | 4.9        |

\*Avg = Average

\*SD = Standard deviation

\*RSD = Relative standard deviation

### Supplementary Table S4.

The tested compositions of the HILIC-MS/MS eluent.

| Eluent combination | Solvent A  | Solvent B                                                     | pH of Solvent B |
|--------------------|------------|---------------------------------------------------------------|-----------------|
| A                  | ACN (75 %) | 100 mM (NH <sub>4</sub> ) <sub>2</sub> CO <sub>3</sub> (25 %) | 8*              |
| B                  | ACN (75 %) | 32 mM CH <sub>3</sub> COONH <sub>4</sub> (25 %)               | 4.99            |
| C                  | ACN (80 %) | 0.05 % FA (20 %)                                              | 2.75            |
| D                  | ACN (80 %) | 0.05 % AA (20 %)                                              | 3.36            |

\*Assessed with pH paper

\* ACN = Acetonitrile; FA = Formic acid; AA=Acetic acid

### Supplementary Table S5.

Established MRM method parameters for each compound. Based on the product ion scans, the optimal collision energy (CE) was determined for the compounds to obtain maximum response to the most abundant product ion

| Compound                 | Precursor (m/z) | Product (m/z) | Fragmentor (V) | CE (V) | CAV (V) |
|--------------------------|-----------------|---------------|----------------|--------|---------|
| Triphenyl phosphate      | 327             | 77*           | 150            | 45     | 3       |
|                          |                 | 168           | 150            | 45     | 3       |
| <i>cis</i> -Pinonic acid | 183             | 69            | 100            | 10     | 6       |
| Sebacic acid             | 201             | 139           | 100            | 15     | 6       |
| Azelaic acid             | 187             | 125           | 100            | 15     | 6       |
| Vanillic acid            | 167             | 152           | 100            | 10     | 8       |
| Suberic acid             | 173             | 111           | 100            | 15     | 1       |
| Mandelic acid            | 151             | 107           | 80             | 10     | 1       |
| Adipic acid              | 145             | 101           | 80             | 15     | 1       |
| Glutaric acid            | 131             | 87            | 80             | 10     | 4       |
| Pyruvic acid             | 87              | N/A           | 40             | 0      | 8       |
| 4-Ketopimelic acid       | 173             | 155           | 80             | 10     | 1       |
| Glycolic acid            | 75              | N/A           | 40             | 0      | 8       |
| Succinic acid            | 117             | 73            | 60             | 10     | 5       |
| Fumaric acid             | 115             | 71            | 40             | 10     | 6       |
| Benzoic acid             | 121             | 77            | 100            | 10     | 5       |
| Phthalic acid            | 165             | 77            | 80             | 15     | 1       |
| Maleic acid              | 115             | 71            | 40             | 10     | 0       |
| Trimesic acid            | 209             | 165           | 100            | 10     | 6       |
| 2-Oxoglutaric acid       | 145             | 101           | 60             | 5      | 0       |
| Malonic acid             | 103             | N/A           | 60             | 0      | 0       |

\* Set as quantifier

\*CE = Collision energy; CAV = Cell acceleration voltage

## Supplementary Table S6.

The calculated LOQs for results achieved by ITEX and SPME Arrow systems.

| LOQ                    | SPME Arrow                       |                                       |                                     | ITEX          |                |
|------------------------|----------------------------------|---------------------------------------|-------------------------------------|---------------|----------------|
|                        | CWR ( $\mu\text{g}/\text{m}^3$ ) | DVB/PDMS ( $\mu\text{g}/\text{m}^3$ ) | MCM-41 ( $\mu\text{g}/\text{m}^3$ ) | Tenax-GR (ng) | MCM-41-TP (ng) |
| Pyridine               | 0.066                            | 0.429                                 | 0.195                               | 0.186         | 0.240          |
| Sec-butylamine         | 0.053                            | 0.019                                 | 0.011                               | 1.157         | 0.025          |
| 1-Butanamine           | 0.209                            | 0.118                                 | 0.193                               | 0.431         | 0.217          |
| 1-Butanenitrile        | 1.171                            | 1.841                                 | 1.558                               | 1.776         | 1.575          |
| 1-Propen-1-amine       | 0.291                            | 2.177                                 | 0.019                               | 0.596         | 0.108          |
| Diethylamine           | 0.154                            | 0.012                                 | 0.271                               | 0.623         | 0.977          |
| Dimethylformamide      | 0.220                            | 0.400                                 | 0.130                               | 0.791         | 0.484          |
| Trimethylamine         | 1.380                            | 0.182                                 | 0.096                               | 0.259         | 0.086          |
| Ethyl acetate          | 0.705                            | 0.429                                 | 0.775                               | 0.676         | 0.330          |
| Isobutanol             | 1.114                            | 1.510                                 | 0.598                               | 0.003         | 0.202          |
| Methyl isobutyl ketone | 0.105                            | 0.065                                 | 0.125                               | 0.175         | 0.094          |
| Hexanal                | 0.185                            | 0.061                                 | 0.111                               | 0.221         | 0.050          |
| Nonane                 | 1.006                            | 0.162                                 | 1.485                               | 3.236         | 1.415          |
| 2,3-Butanedione        | 0.034                            | -                                     | 0.144                               | 0.162         | 2.624          |
| Benzaldehyde           | 0.031                            | 0.043                                 | 0.168                               | 0.080         | 0.440          |
| Acetophenone           | 1.611                            | 0.006                                 | 0.550                               | 0.113         | 0.058          |
| p-Cymene               | 0.571                            | 0.094                                 | 1.777                               | 3.021         | 0.497          |
| Ethylbenzene           | 0.877                            | 0.362                                 | 4.651                               | 11.752        | 4.324          |

\*LOQ = Limit of quantification

\*SPME Arrow = Solid-phase micro extraction arrow

\*ITEX = in-tube extraction

## Supplementary Table S7

Concentrations of nitrogen-containing compounds detected in gas and particle phases at mixed altitudes (50 – 400 m). Conversion from  $\text{ng m}^{-3}$  to  $\text{ppt}_v$  have been made using the conversion factor ( $\text{ppt}_v = \text{Concentration (ng m}^{-3}) : (0.0409 \times (\text{MW}))$ ). (Finlayson-Pitts and Pitts, James N., 2000)

| Compound                | Mr    | Concentration in Gas-phase |                    | Concentration in Particle-phase |                    |
|-------------------------|-------|----------------------------|--------------------|---------------------------------|--------------------|
|                         |       | ( $\text{ng m}^{-3}$ )     | ( $\text{ppt}_v$ ) | ( $\text{ng m}^{-3}$ )          | ( $\text{ppt}_v$ ) |
| Methylamine             | 31.1  | $\leq 431.6$               | $\leq 339.31$      | $\leq 212.1$                    | $\leq 166.7$       |
| Dimethylamine           | 45.1  | $\leq 1004.4$              | $\leq 544.5$       | $\leq 5908.9$                   | $\leq 3203.3$      |
| sec-Butylamine          | 73.1  | $\leq 156.3$               | $\leq 52.2$        | $\leq 4089.6$                   | $\leq 1367.8$      |
| 2-Propen-1-amine        | 57.1  | $\leq 30.0$                | $\leq 12.8$        | $\leq 134.1$                    | $\leq 57.4$        |
| 2-Propanamine, 2-methyl | 73.1  | $\leq 196.2$               | $\leq 65.6$        | $\leq 238.8$                    | $\leq 79.8$        |
| 1-Butanamine            | 73.1  | $\leq 388.9$               | $\leq 130.0$       | $\leq 711.4$                    | $\leq 237.9$       |
| 2-Pentanamine           | 87.2  | $\leq 395.4$               | $\leq 110.8$       | $\leq 211.1$                    | $\leq 59.1$        |
| 1-Hexanamine            | 101.2 | $\leq 493.3$               | $\leq 119.1$       | $\leq 4315.6$                   | $\leq 1042.6$      |
| n-Hexylmethylamine      | 115.2 | $\leq 340.2$               | $\leq 72.2$        | $\leq 573.2$                    | $\leq 121.6$       |
| 4-Heptylamine           | 115.2 | $\leq 257.3$               | $\leq 54.6$        | $\leq 189.9$                    | $\leq 40.3$        |
| N,1-Dimethylhexylamine  | 129.2 | $\leq 1239.6$              | $\leq 234.5$       | $\leq 686.3$                    | $\leq 129.8$       |
| Formamide               | 45.0  | $\leq 396.5$               | $\leq 215.4$       | -                               | -                  |
| 2-Amino-1-propanol      | 75.1  | $\leq 789.9$               | $\leq 257.1$       | $\leq 129.0$                    | $\leq 42.0$        |
| Ethyl methylcarbamate   | 103.1 | $\leq 81.3$                | $\leq 19.2$        | $\leq 125.9$                    | $\leq 29.8$        |
| 2-Propenamide           | 71.1  | $\leq 94.5$                | $\leq 32.5$        | -                               | -                  |
| 1H-Imidazole            | 68.1  | $\leq 136.1$               | $\leq 48.8$        | $\leq 645.5$                    | $\leq 231.7$       |
| Butanenitrile           | 69.1  | $\leq 2005.0$              | $\leq 709.4$       | $\leq 6121.6$                   | $\leq 2166.0$      |
| Pyridine                | 79.1  | $\leq 491.5$               | $\leq 151.9$       | $\leq 958.2$                    | $\leq 296.1$       |

\*Mr = Molecular weight (g/mol)

## Supplementary Table S8

Concentrations of other volatile organic compounds detected in gas and particle phases at mixed altitudes (50 – 400 m). Conversion from  $\text{ng m}^{-3}$  to  $\text{ppt}_v$  have been made using the conversion factor ( $\text{ppt}_v = \text{Concentration (ng m}^{-3}) : (0.0409 \times (\text{MW}))$ ). (Finlayson-Pitts and Pitts, James N., 2000)

| Compound                         | Mr    | Concentration in Gas-phase |                    | Concentration in Particle-phase |                    |
|----------------------------------|-------|----------------------------|--------------------|---------------------------------|--------------------|
|                                  |       | ( $\text{ng m}^{-3}$ )     | ( $\text{ppt}_v$ ) | ( $\text{ng m}^{-3}$ )          | ( $\text{ppt}_v$ ) |
| 2-Methyl-1-propanol              | 74.1  | $\leq 4208.6$              | $\leq 1388.6$      | $\leq 1064.7$                   | $\leq 351.3$       |
| 2-Ethyl-1-hexanol                | 130.1 | < LOQ                      | < LOQ              | $\leq 4114.1$                   | $\leq 773.1$       |
| 2-Butanone                       | 72.1  | $\leq 218.9$               | $\leq 74.2$        | $\leq 2598.7$                   | $\leq 881.2$       |
| Ethyl isobutyl keton             | 114.2 | < LOQ                      | < LOQ              | $\leq 806.1$                    | $\leq 172.5$       |
| 2,3-Butanedione                  | 86.1  | $\leq 2436.1$              | 691.7              | $\leq 4865.3$                   | $\leq 1381.6$      |
| 2,3-Pentanedione                 | 100.1 | $\leq 483.2$               | 118.0              | $\leq 2352.4$                   | $\leq 574.5$       |
| 3,4-Hexadione                    | 114.1 | < LOQ                      | < LOQ              | $\leq 4871.9$                   | $\leq 1043.9$      |
| 5-Undecanone                     | 170.3 | < LOQ                      | < LOQ              | $\leq 900.8$                    | $\leq 129.3$       |
| 2(3H)-Furanone, dihydro-5-propyl | 128.2 | $\leq 354.2$               | $\leq 67.5$        | $\leq 1829.0$                   | $\leq 348.8$       |
| trans-Limonen oxide              | 152.2 | $\leq 2210.9$              | $\leq 355.1$       | $\leq 6886.0$                   | $\leq 1106.2$      |
| Methyl glyoxal                   | 72.1  | $\leq 4695.3$              | $\leq 1592.2$      | $\leq 8613.2$                   | $\leq 2920.8$      |
| Formic acid                      | 46.0  | $\leq 3239.4$              | $\leq 1721.8$      | $\leq 380.2$                    | $\leq 202.0$       |
| 2-Butenoic acid                  | 86.1  | -                          | 0                  | $\leq 294.8$                    | $\leq 83.7$        |
| Oxalic acid, butyl propyl ester  | 188.2 | -                          | 0                  | $\leq 5299.4$                   | $\leq 688.4$       |
| Acetic acid                      | 60.1  | $\leq 6898.3$              | $\leq 2806.3$      | $\leq 8603.4$                   | $\leq 3500.0$      |
| Ethyl acetate                    | 88.1  | $\leq 2198.8$              | $\leq 610.2$       | $\leq 5105.2$                   | $\leq 1416.8$      |
| 2,2-Dimethyloctane               | 142.3 | < LOQ                      | < LOQ              | $\leq 4209.2$                   | $\leq 723.2$       |
| 3,4,5-Trimethylheptane           | 142.3 | $\leq 279.2$               | $\leq 47.9$        | $\leq 5350.4$                   | $\leq 919.3$       |
| 2-5-Dimethylnonane               | 156.3 | < LOQ                      | < LOQ              | $\leq 3408.9$                   | $\leq 533.2$       |
| 6-Ethyl-2-methyldecane           | 184.4 | < LOQ                      | < LOQ              | $\leq 7091.0$                   | $\leq 940.2$       |
| 2,6,11-Trimethyldodecane         | 212.4 | < LOQ                      | < LOQ              | $\leq 1746.1$                   | $\leq 200.9$       |
| p-Cymene                         | 134.2 | $\leq 104.4$               | $\leq 19.0$        | $\leq 7772.5$                   | $\leq 1416.0$      |
| Benzene                          | 78.1  | $\leq 644.9$               | $\leq 201.8$       | $\leq 3418.0$                   | $\leq 1070.0$      |
| Ethylbenzene                     | 106.2 | $\leq 363.6$               | $\leq 83.7$        | $\leq 3041.6$                   | $\leq 700.2$       |
| Toluene                          | 92.1  | $\leq 143.6$               | $\leq 38.1$        | $\leq 7715.0$                   | $\leq 2048.1$      |
| 2-Ethyl-m-xylene                 | 134.2 | $\leq 35.1$                | $\leq 6.4$         | $\leq 1463.0$                   | $\leq 266.5$       |
| p-Xylene                         | 106.2 | $\leq 198.7$               | $\leq 45.7$        | $\leq 1195.5$                   | $\leq 275.2$       |
| Propene                          | 42.1  | $\leq 1715.0$              | $\leq 995.9$       | $\leq 1847.2$                   | $\leq 1072.7$      |
| 2-Methoxypropene                 | 72.1  | $\leq 1258.1$              | $\leq 426.6$       | $\leq 502.2$                    | $\leq 170.3$       |
| Hexanal                          | 100.2 | $\leq 3984.0$              | $\leq 972.1$       | $\leq 1020.4$                   | $\leq 248.9$       |
| Benzaldehyde                     | 106.0 | $\leq 185.8$               | $\leq 42.8$        | $\leq 1098.3$                   | $\leq 253.3$       |
| 3-Methylbenzaldehyde             | 120.2 | $\leq 331.7$               | $\leq 67.4$        | $\leq 684.5$                    | $\leq 139.2$       |

\*Mr = Molecular weight (g/mol)



### Supplementary Table S9

Recoveries obtained for compounds collected by ITEX sampling system with filter accessory.

| Compounds                       | Recovery (%) | Compounds                 | Recovery (%) |
|---------------------------------|--------------|---------------------------|--------------|
| 2-Methyl-1-propanol             | 81.4         | 3,4,5-Trimethylheptane    | 26.8         |
| 2,3-Butanedione                 | 58.3         | 6-Ethyl-2-methyldecane    | 37.5         |
| 2,3-Pentanedione                | 84.9         | 2,6,11-Trimethyldodecane  | 13.2         |
| 5-Undecanone                    | 9.2          | 2-methyl-2-propen-1-amine | 99.2         |
| Trans-limonen oxide             | 94.4         | 2-Pentanamine             | 87.2         |
| Methyl glyoxal                  | 98.8         | 1-Hexanamine              | 96.8         |
| Acetic acid                     | 79.7         | n-Hexylmethylamine        | 15.3         |
| Oxalic acid, butyl propyl ester | 5.8          | 4-Heptylamine             | 64.9         |
| Ethyl acetate                   | 95.1         | 2-Amino-1-propanol        | 41.4         |

### Supplementary Table S10

Determined LODs and LOQs for the acids based on parameters provided by linear regression analysis using HILIC/MS-MS.

| Acid                      | Intercept | Std. Error of Intercept | Slope  | LOD (ng/mL) | LOQ (ng/mL) |
|---------------------------|-----------|-------------------------|--------|-------------|-------------|
| <b>2-Oxoglutaric acid</b> | -36.166   | 37.247                  | 2.292  | 49          | 161         |
| <b>4-Ketopimelic</b>      | -641.995  | 54.629                  | 16.508 | 9.9         | 33          |
| <b>Adipic acid</b>        | -188.943  | 27.922                  | 23.168 | 3.6         | 12          |
| <b>Azelaic acid</b>       | -50.384   | 43.565                  | 17.113 | 7.6         | 25          |
| <b>Benzoic acid</b>       | 4.711     | 1.729                   | 4.504  | 1.2         | 3.8         |
| <b>cis-Pinonic acid</b>   | 23.434    | 4.790                   | 2.386  | 6.0         | 20          |
| <b>Fumaric acid</b>       | -149.825  | 3.048                   | 3.986  | 2.3         | 7.6         |
| <b>Glutaric acid</b>      | -62.521   | 32.090                  | 21.988 | 4.4         | 14          |
| <b>Glycolic acid</b>      | -100.415  | 17.613                  | 3.723  | 14          | 47          |
| <b>Maleic acid</b>        | 28.810    | 22.979                  | 8.818  | 7.8         | 26          |
| <b>Malonic acid</b>       | -4.592    | 0.598                   | 1.185  | 1.5         | 5.0         |
| <b>Mandelic acid</b>      | 18.588    | 17.224                  | 17.813 | 2.9         | 10          |
| <b>Phthalic acid</b>      | 33.560    | 15.300                  | 10.644 | 4.3         | 14          |
| <b>Pyruvic acid</b>       | -1944.231 | 204.268                 | 1.987  | 308         | 1 018       |
| <b>Sebacic acid</b>       | -179.209  | 34.928                  | 28.576 | 3.7         | 12          |
| <b>Suberic acid</b>       | -55.378   | 6.770                   | 22.078 | 0.92        | 3.0         |
| <b>Succinic acid</b>      | -17.288   | 24.260                  | 20.605 | 3.5         | 12          |
| <b>Trimesic acid</b>      | 499.680   | 294.814                 | 3.477  | 254         | 839         |
| <b>Vanillic acid</b>      | 15.056    | 0.361                   | 0.915  | 1.2         | 3.9         |

## Supplementary Table S11

Two minutes average of black carbon (BC) and total particle concentrations measured at the altitudes of 100, 200, 300, and 400 m in three days measurement (9, 10, and 11 October 2021).

| 100 m    |                          |        |         |                            |       |         |
|----------|--------------------------|--------|---------|----------------------------|-------|---------|
| Time     | BC (ng m <sup>-3</sup> ) | STDev  | RSD (%) | TPC (d(cm <sup>-3</sup> )) | STDev | RSD (%) |
| 10.30 am | 2930.7                   | 1133.6 | 39.7    | 739.6                      | 31.6  | 4.4     |
| 13.00 pm | 2461.5                   | 1299.9 | 54.2    | 591.7                      | 0.0   | 0.0     |
| 17.00 pm | 2567.6                   | 1202.4 | 48.0    | 1113.9                     | 15.4  | 1.4     |
| 10.23 am | 3054.7                   | 1348.8 | 45.3    | 1087.8                     | 42.9  | 4.0     |
| 12.54 pm | 2845.7                   | 941.3  | 33.9    | 1316.2                     | 12.9  | 1.0     |
| 13.30 pm | 1429.7                   | 1140.4 | 81.8    | 1263.3                     | 91.2  | 7.4     |
| 17.00 pm | 1841.6                   | 1487.9 | 82.8    | 1467.6                     | 41.1  | 2.9     |
| 09.00 am | 2175.9                   | 891.4  | 73.9    | 2530.6                     | 62.3  | 2.5     |
| 12.00 pm | 1744.9                   | 1116.6 | 77.5    | 2082.9                     | 177.9 | 8.8     |
| 12.30 pm | 1750.4                   | 1318.4 | 77.2    | 409.5                      | 103.9 | 26.0    |
| 200 m    |                          |        |         |                            |       |         |
| Time     | BC (ng m <sup>-3</sup> ) | STDev  | RSD (%) | TPC (d(cm <sup>-3</sup> )) | STDev | RSD (%) |
| 10.30 am | 2356.2                   | 625.9  | 27.0    | 584.5                      | 35.7  | 6.2     |
| 13.00 pm | 2392.3                   | 1637.5 | 69.5    | 608.1                      | 0.0   | 0.0     |
| 17.00 pm | 2335.8                   | 985.3  | 42.8    | 1091.5                     | 16.9  | 1.6     |
| 10.23 am | 3265.4                   | 1701.2 | 52.9    | 1178.6                     | 86.5  | 7.5     |
| 12.54 pm | 3433.7                   | 2343.5 | 69.3    | 1366.7                     | 24.1  | 1.8     |
| 13.30 pm | 2795.2                   | 1332.5 | 48.4    | 1175.4                     | 22.6  | 1.9     |
| 17.00 pm | 2394.6                   | 1810.8 | 76.8    | 1477.5                     | 34.5  | 2.4     |
| 09.00 am | 2690.2                   | 1464.3 | 55.3    | 2372.3                     | 117.7 | 5.0     |
| 12.00 pm | 2240.8                   | 1062.0 | 48.1    | 2108.4                     | 42.7  | 2.1     |
| 12.30 pm | 1568.9                   | 2012.6 | 130.2   | 389.1                      | 69.7  | 18.2    |
| 300 m    |                          |        |         |                            |       |         |
| Time     | BC (ng m <sup>-3</sup> ) | STDev  | RSD (%) | TPC (d(cm <sup>-3</sup> )) | STDev | RSD (%) |
| 10.30 am | 3349.9                   | 412.3  | 12.4    | 595.5                      | 57.2  | 9.7     |
| 13.00 pm | 3364.1                   | 929.8  | 27.8    | 564.3                      | 4.1   | 0.7     |
| 17.00 pm | 3507.9                   | 641.0  | 18.4    | 1016.3                     | 46.9  | 4.6     |
| 10.23 am | 4076.5                   | 981.5  | 24.2    | 827.6                      | 114.9 | 14.0    |
| 12.54 pm | 3531.7                   | 2208.4 | 62.9    | 1436.3                     | 135.5 | 9.5     |
| 13.30 pm | 2896.5                   | 4880.1 | 169.4   | 1178.0                     | 32.6  | 2.8     |
| 17.00 pm | 3986.7                   | 1728.5 | 43.6    | 1432.4                     | 36.9  | 2.6     |
| 09.00 am | 4285.0                   | 1693.2 | 39.7    | 2383.2                     | 90.9  | 3.8     |
| 12.00 pm | 3495.6                   | 1623.1 | 46.7    | 2003.9                     | 363.7 | 18.2    |
| 12.30 pm | 3205.5                   | 1388.5 | 43.5    | 1058.8                     | 33.3  | 3.2     |

\* BC = Black carbon

\* TPC = Total particle concentration

### Supplementary Table S11 (Cont..)

Two minutes average of black carbon (BC) and total particle concentrations measured at the altitudes of 100, 200, 300, and 400 m in three days measurement (9, 10, and 11 October 2021).

| 400m     |                          |        |         |                            |       |         |
|----------|--------------------------|--------|---------|----------------------------|-------|---------|
| Time     | BC (ng m <sup>-3</sup> ) | STDev  | RSD (%) | TPC (d(cm <sup>-3</sup> )) | STDev | RSD (%) |
| 10.30 am | 3423.2                   | 631.9  | 18.3    | 622.0                      | 33.1  | 5.3     |
| 13.00 pm | 3386.3                   | 382.6  | 11.2    | 615.9                      | 70.1  | 11.3    |
| 17.00 pm | 3692.4                   | 434.3  | 11.7    | 768.3                      | 17.0  | 2.2     |
| 10.23 am | 4723.6                   | 332.9  | 7.0     | 530.0                      | 130.0 | 24.4    |
| 12.54 pm | 4843.3                   | 963.0  | 19.8    | 1065.0                     | 138.1 | 12.9    |
| 13.30 pm | 2798.7                   | 530.2  | 18.8    | 843.0                      | 73.8  | 8.7     |
| 17.00 pm | 5304.9                   | 1120.9 | 21.0    | 1276.1                     | 80.0  | 6.2     |
| 09.00 am | 5513.9                   | 961.0  | 17.3    | 2049.7                     | 101.5 | 4.9     |
| 12.00 pm | 3765.9                   | 724.4  | 19.1    | 1971.1                     | 39.6  | 2.0     |
| 12.30 pm | 2146.8                   | 1218.3 | 56.4    | 946.2                      | 60.8  | 6.4     |

\* BC = Black carbon

\* TPC = Total particle concentration

### Supplementary Table S12

Daily average of black carbon (BC) and total particle concentrations measured at the altitudes of 100, 200, 300, and 400 m in three days measurement (9, 10, and 11 October 2021).

| Day | Average at 100 m         |                            | Average at 200 m         |                            | Average at 300 m         |                            | Average at 400 m         |                            |
|-----|--------------------------|----------------------------|--------------------------|----------------------------|--------------------------|----------------------------|--------------------------|----------------------------|
|     | BC (ng m <sup>-3</sup> ) | TPC (d(cm <sup>-3</sup> )) | BC (ng m <sup>-3</sup> ) | TPC (d(cm <sup>-3</sup> )) | BC (ng m <sup>-3</sup> ) | TPC (d(cm <sup>-3</sup> )) | BC (ng m <sup>-3</sup> ) | TPC (d(cm <sup>-3</sup> )) |
| 1   | 2653.3                   | 815.1                      | 2361.4                   | 761.3                      | 3407.3                   | 725.4                      | 3500.6                   | 668.8                      |
| 2   | 2293.0                   | 1283.7                     | 2972.2                   | 1299.5                     | 3622.9                   | 1218.6                     | 4417.6                   | 928.5                      |
| 3   | 1890.4                   | 1674.3                     | 2166.7                   | 1623.2                     | 3662.0                   | 1815.3                     | 3808.9                   | 1655.7                     |

\* BC = Black carbon

\* TPC = Total particle concentration

### Reference

Finlayson-Pitts, B.J., Pitts, James N., J., 2000. Chemistry of the upper and lower atmosphere : theory, experiments, and applications. Academic Press, San Diego.
